# Supplementary material for: RNA-Binding Protein Motifs Predict microRNA Secretion and Cellular Retention in Hypothalamic and Other Cell Types
Source: MDPI journal article supplement (doi:10.3390/biomedicines12040857), 2024-04-12
Supplement: s1 [file s1]

# Supplemental Materials

## **RNA binding protein motifs predict microRNA secretion and cellular retention in hypothalamic and other cell types.**

Wenyuan He<sup>1</sup> and Denise D. Belsham<sup>1,2 \*</sup>

<sup>1</sup>Departments of Physiology, University of Toronto, Ontario, Canada.

<sup>2</sup> Departments of Medicine, University of Toronto, Ontario, Canada.

\* Corresponding Author at

Department of Physiology, University of Toronto, Medical Sciences Building 3247A, 1

17 Kings College Circle, Toronto, ON, Canada, M5S 1A8

18 Tel.: 416-946-7646; Fax: 416-978-4940; E-mail address: [d.belsham@utoronto.ca](mailto:d.belsham@utoronto.ca)

## Extended Figure 4

RBP motifs statistically enriched in sEVs or cells. Annotations indicate motifs identified from homologous RNA-binding proteins (RNABPs) in other species: \**Homo sapiens*, <sup>g</sup>*Gallus gallus*, <sup>t</sup>*Tetraodon nigroviridis*, <sup>x</sup>*Xenopus tropicalis*, <sup>#</sup>*Drosophila melanogaster*.

| 3T3-L1                   |               |         |                  |                  |
|--------------------------|---------------|---------|------------------|------------------|
| Cell-enriched RBP motifs |               |         |                  |                  |
| RNABP                    | Binding Motif | E-value | Enrichment ratio | Enrichment ratio |
| RBMS1*                   |               | 1.0e-3  | 35.7%            | 14.4%            |
| KHDBS2*                  |               | 1.3e-3  | 42.0%            | 19.6%            |
| PABPC3*                  |               | 1.0e-3  | 51.0%            | 27.5%            |
| RBK3*                    |               | 1.8e-3  | 75.8%            | 52.9%            |
| PABPC1*                  |               | 1.0e-3  | 47.1%            | 24.8%            |
| SMT3*                    |               | 1.5e-3  | 40.8%            | 19.6%            |
| PABPC1*                  |               | 1.5e-3  | 40.8%            | 19.6%            |
| HMNRP1*                  |               | 4.1e-3  | 31.2%            | 12.4%            |
| KHDBS1*                  |               | 1.0e-3  | 46.6%            | 24.2%            |
| RBH42*                   |               | 3.8e-3  | 29.9%            | 13.7%            |
| MEK3C*                   |               | 4.7e-3  | 74.5%            | 56.2%            |
| sEV-enriched RBP motifs  |               |         |                  |                  |
| RNABP                    | Binding Motif | E-value | Enrichment ratio | Enrichment ratio |
| SRSP4*                   |               | 2.4e-3  | 54.9%            | 25.5%            |
| FUS*                     |               | 4.8e-3  | 52.9%            | 28.7%            |

  

| BAT                      |               |         |                  |                  |
|--------------------------|---------------|---------|------------------|------------------|
| Cell-enriched RBP motifs |               |         |                  |                  |
| RNABP                    | Binding Motif | E-value | Enrichment ratio | Enrichment ratio |
| KHDBS2*                  |               | 4.4e-3  | 46.5%            | 14.1%            |
| PTSP1*                   |               | 9.3e-3  | 31.9%            | 8.3%             |
| HMNRP1*                  |               | 9.8e-3  | 58.4%            | 24.4%            |
| KHDBS1*                  |               | 1.0e-3  | 33.0%            | 9.0%             |
| RBH42*                   |               | 2.0e-3  | 25.9%            | 5.8%             |
| CSDA*                    |               | 3.1e-3  | 46.5%            | 17.9%            |
| PCBP3*                   |               | 7.1e-3  | 20.5%            | 3.8%             |
| YBX1*                    |               | 6.2e-3  | 54.6%            | 24.4%            |
| ZC3H1*                   |               | 1.0e-3  | 27.6%            | 7.7%             |
| SPTQ*                    |               | 1.8e-3  | 54.1%            | 25.0%            |
| SNRPB2*                  |               | 1.8e-3  | 65.9%            | 33.3%            |
| HMNRP1*                  |               | 3.0e-3  | 59.5%            | 28.5%            |
| SYNCRP*                  |               | 3.9e-3  | 53.5%            | 25.6%            |
| TUT1*                    |               | 3.9e-3  | 64.3%            | 33.3%            |
| TIAL1*                   |               | 3.5e-3  | 48.1%            | 23.1%            |
| HMNRP1*                  |               | 1.1e-3  | 56.8%            | 29.5%            |
| KHDBS1*                  |               | 1.3e-3  | 43.8%            | 20.5%            |
| SMT3*                    |               | 1.4e-3  | 35.1%            | 14.7%            |
| RBH3*                    |               | 1.5e-3  | 24.9%            | 8.3%             |
| FMR1*                    |               | 2.7e-3  | 31.4%            | 12.8%            |
| PCBP2*                   |               | 2.7e-3  | 59.5%            | 32.7%            |
| PABPC1*                  |               | 2.4e-3  | 35.1%            | 15.4%            |
| YBX2*                    |               | 2.5e-3  | 56.8%            | 30.8%            |
| HMNRP1*                  |               | 2.8e-3  | 43.2%            | 21.2%            |
| RBH11*                   |               | 2.9e-3  | 63.2%            | 35.9%            |
| PABPC3*                  |               | 2.9e-3  | 50.3%            | 24.3%            |
| PCBP1*                   |               | 3.2e-3  | 23.8%            | 8.3%             |
| HMNRP1*                  |               | 3.0e-3  | 56.8%            | 31.4%            |
| TIAL1*                   |               | 3.6e-3  | 42.7%            | 21.2%            |
| ALCP1*                   |               | 3.9e-3  | 47.0%            | 24.4%            |
| DAZAP1*                  |               | 4.9e-3  | 49.2%            | 26.3%            |
| sEV-enriched RBP motifs  |               |         |                  |                  |
| RNABP                    | Binding Motif | E-value | Enrichment ratio | Enrichment ratio |
| CDUT3*                   |               | 2.3e-3  | 2.7%             | 16.0%            |
| RBH42*                   |               | 6.9e-3  | 3.2%             | 16.0%            |

  

| AML12                    |               |         |                  |                  |
|--------------------------|---------------|---------|------------------|------------------|
| Cell-enriched RBP motifs |               |         |                  |                  |
| RNABP                    | Binding Motif | E-value | Enrichment ratio | Enrichment ratio |
| HMNRP1*                  |               | 3.47e-3 | 49.7%            | 11.7%            |
| RBH41*                   |               | 1.1e-3  | 75.2%            | 30.6%            |
| SYNCRP*                  |               | 7.4e-3  | 58.2%            | 22.5%            |
| KHDBS1*                  |               | 7.5e-3  | 46.4%            | 15.5%            |
| HMNRP1*                  |               | 1.2e-3  | 54.2%            | 20.7%            |
| TUT1*                    |               | 3.77e-3 | 70.6%            | 33.3%            |
| HMNRP1*                  |               | 3.8e-3  | 43.1%            | 15.3%            |
| PABPC3*                  |               | 6.1e-3  | 36.8%            | 10.8%            |
| YBX2*                    |               | 1.3e-3  | 40.5%            | 15.3%            |
| TUT1*                    |               | 1.3e-3  | 34.6%            | 11.7%            |
| DAZAP1*                  |               | 1.4e-3  | 75.8%            | 30.6%            |
| Gm10101*                 |               | 2.1e-3  | 20.9%            | 4.5%             |
| SRSP3*                   |               | 2.6e-3  | 41.8%            | 17.1%            |
| ALCP1*                   |               | 2.9e-3  | 30.1%            | 9.9%             |
| TIAL1*                   |               | 3.7e-3  | 49.0%            | 22.5%            |
| YBX1*                    |               | 3.7e-3  | 49.0%            | 22.5%            |
| sEV-enriched RBP motifs  |               |         |                  |                  |
| RNABP                    | Binding Motif | E-value | Enrichment ratio | Enrichment ratio |
| Pp121*                   |               | 1.0e-3  | 48.6%            | 15.7%            |
| RBH4*                    |               | 1.6e-3  | 25.2%            | 3.9%             |
| HMNRP1*                  |               | 1.7e-3  | 55.0%            | 20.9%            |
| HMNRP1*                  |               | 1.5e-3  | 40.5%            | 13.7%            |
| Sand4*                   |               | 4.1e-3  | 29.7%            | 8.5%             |
| Lin28B*                  |               | 2.1e-3  | 39.6%            | 16.3%            |
| SRSP4*                   |               | 4.3e-3  | 55.1%            | 14.4%            |

  

| C2C12                    |               |         |                  |                  |
|--------------------------|---------------|---------|------------------|------------------|
| Cell-enriched RBP motifs |               |         |                  |                  |
| RNABP                    | Binding Motif | E-value | Enrichment ratio | Enrichment ratio |
| ZC3H1*                   |               | 1.01e-3 | 57.1%            | 16.2%            |
| KHDBS1*                  |               | 6.2e-3  | 55.0%            | 19.1%            |
| Smt*                     |               | 8.1e-3  | 18.6%            | 2.1%             |
| Daazap1*                 |               | 8.5e-3  | 27.3%            | 6.4%             |
| HMNRP1*                  |               | 8.7e-3  | 40.7%            | 13.5%            |
| SYNCRP*                  |               | 1.03e-3 | 65.0%            | 29.1%            |
| ALCP1*                   |               | 1.04e-3 | 58.6%            | 24.8%            |
| YBX1*                    |               | 1.09e-3 | 27.1%            | 6.4%             |
| HMNRP1*                  |               | 1.8e-3  | 67.1%            | 31.2%            |
| KHDBS1*                  |               | 2.3e-3  | 51.4%            | 21.3%            |
| Pabpc3*                  |               | 2.4e-3  | 57.9%            | 25.5%            |
| Rbm3*                    |               | 2.4e-3  | 55.8%            | 22.7%            |
| Pabpc1*                  |               | 3.8e-3  | 47.1%            | 19.1%            |
| Tut1*                    |               | 5.3e-3  | 44.3%            | 17.7%            |
| Rbm3*                    |               | 7.2e-3  | 63.6%            | 31.2%            |
| Rbm1*                    |               | 1.09e-3 | 45.4%            | 17.0%            |
| Rbm1*                    |               | 1.3e-3  | 29.0%            | 7.1%             |
| Ela2*                    |               | 1.3e-3  | 27.9%            | 8.5%             |
| Rbm3*                    |               | 2.2e-3  | 33.6%            | 12.8%            |
| Gm10101*                 |               | 3.2e-3  | 25.8%            | 7.1%             |
| SRSP4*                   |               | 3.9e-3  | 61.4%            | 32.6%            |
| Cpb2*                    |               | 4.0e-3  | 51.4%            | 25.5%            |
| Sart3*                   |               | 4.2e-3  | 40.0%            | 17.7%            |
| Pabpc1*                  |               | 4.2e-3  | 40.0%            | 17.7%            |
| sEV-enriched RBP motifs  |               |         |                  |                  |
| RNABP                    | Binding Motif | E-value | Enrichment ratio | Enrichment ratio |
| RBH4*                    |               | 6.0e-3  | 53.2%            | 27.1%            |
| HMNRP1*                  |               | 1.1e-3  | 13.5%            | 0.7%             |
| FUS*                     |               | 1.4e-3  | 41.1%            | 17.9%            |
| EP251*                   |               | 1.6e-3  | 58.2%            | 22.9%            |
| HMNRP1*                  |               | 6.2e-3  | 42.6%            | 20.7%            |
| SRSP4*                   |               | 1.4e-3  | 26.4%            | 10.7%            |
| RBH4*                    |               | 1.4e-3  | 36.9%            | 17.1%            |
| CELF4*                   |               | 1.7e-3  | 41.8%            | 21.4%            |
| LMNB1*                   |               | 1.2e-3  | 17.7%            | 4.3%             |
| SAND4*                   |               | 3.9e-3  | 39.7%            | 20.7%            |
| RBH4*                    |               | 3.9e-3  | 32.6%            | 15.0%            |

  

| SVEC                     |               |         |                  |                  |
|--------------------------|---------------|---------|------------------|------------------|
| Cell-enriched RBP motifs |               |         |                  |                  |
| RNABP                    | Binding Motif | E-value | Enrichment ratio | Enrichment ratio |
| ALCP1*                   |               | 1.7e-3  | 58.4%            | 13.4%            |
| HMNRP1*                  |               | 1.52e-3 | 68.3%            | 22.4%            |
| CYBB*                    |               | 4.8e-3  | 46.5%            | 11.9%            |
| SYNCRP*                  |               | 1.12e-3 | 65.4%            | 20.9%            |
| ZC3H1*                   |               | 6.9e-3  | 53.5%            | 16.4%            |
| RBH41*                   |               | 7.67e-3 | 77.2%            | 31.3%            |
| CYBB*                    |               | 1.14e-3 | 55.6%            | 7.5%             |
| YBX1*                    |               | 1.45e-3 | 65.4%            | 23.9%            |
| YBX2*                    |               | 3.40e-3 | 44.6%            | 13.4%            |
| PABPC3*                  |               | 2.40e-3 | 44.6%            | 13.4%            |
| KHDBS2*                  |               | 2.62e-3 | 63.4%            | 25.4%            |
| ROD1*                    |               | 3.40e-3 | 66.4%            | 23.9%            |
| KHDBS1*                  |               | 3.91e-3 | 50.5%            | 17.0%            |
| sEV-enriched RBP motifs  |               |         |                  |                  |
| RNABP                    | Binding Motif | E-value | Enrichment ratio | Enrichment ratio |
| SAND4*                   |               | 5.6e-3  | 38.8%            | 6.9%             |
| RBH4*                    |               | 2.9e-3  | 43.3%            | 10.9%            |
| SRSP4*                   |               | 4.2e-3  | 47.8%            | 12.9%            |
| SRSP4*                   |               | 4.7e-3  | 64.2%            | 23.8%            |
| LMNB1*                   |               | 4.7e-3  | 29.9%            | 5.0%             |
| RBH4*                    |               | 1.0e-3  | 26.9%            | 5.0%             |

**Supplemental Figure S1: AU% content and miRNA length of sEV or intracellularly enriched miRNAs.** The percentage of AU versus GC composition was examined in sEV-enriched miRNAs versus miRNAs enriched intracellularly in mHypoE-46 neurons. Consistent with observations made by Garcia et al., 2021, sEV-enriched miRNAs, on average, contained a significantly lower AU%. This difference in AU% composition across multiple cell models is also reflected in the enriched RBP motifs, where sEV-enriched miRNAs typically have RBP motifs that are more CG-enriched than those enriched intracellularly. The average length of the sEV-enriched miRNAs is no different from that of the intracellularly enriched miRNAs.

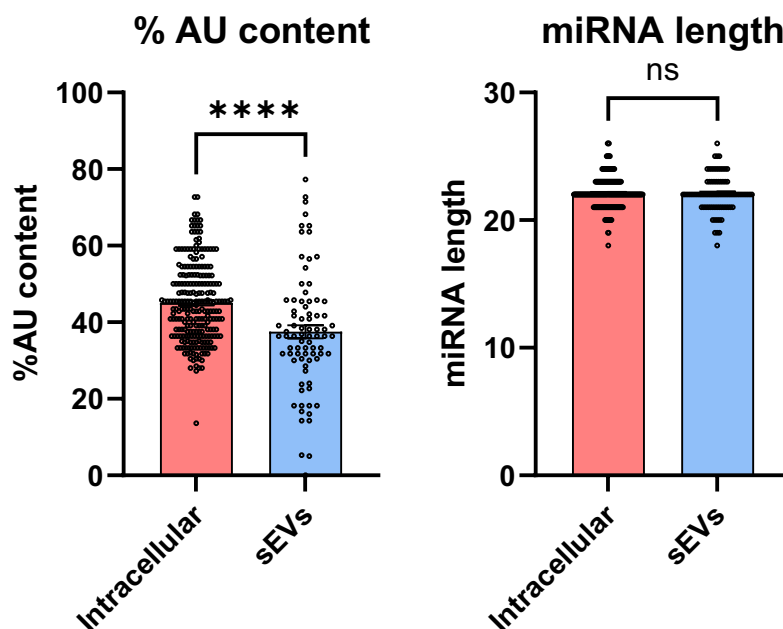

**Supplemental Table S1: Complete pathway analysis.**

See excel document – He and Belsham Supplemental Table S1.

**Supplemental Table S2: RNA-seq levels of the RBPs in mHypoE-46 neurons.** Comparative mRNA expression levels of identified RBPs in hypothalamic neurons as determined by RNA-sequencing, with Rpl7 serving as a reference gene. Number represents fragments per kilobase of transcript per million mapped reads.

|        |       |  |          |       |
|--------|-------|--|----------|-------|
| Pcbp3  | 7.3   |  | Samd4    | 14.4  |
| Ptbp1  | 243.5 |  | Rbm4b    | 2     |
| Pcbp1  | 257.4 |  | Hnrnph2  | 52.9  |
| Pcbp2  | 263.1 |  | Srsf9    | 84.6  |
| Tia1   | 11.9  |  | Rbm4     | 8.7   |
| U2af2  | 155.5 |  | Srsf4    | 35.1  |
| RbmX   | 13.6  |  | Hnrnpa2b | 434.6 |
| Matr3  | 48.2  |  | Rbm8a    | 55.2  |
| Snrpb2 | 47.1  |  | Nono     | 229.3 |
| Tut1   | 21.8  |  | Fxr2     | 55.4  |
| Mbnl1  | 45.1  |  | Pprc1    | 40.4  |
| Hnrnpc | 152.5 |  | Fus      | 127.3 |
| Cpeb2  | 2.1   |  |          |       |
| Hnrnpk | 273.3 |  |          |       |
| Tiall  | 18.2  |  |          |       |
| Raly1  | 0     |  | Rpl7     | 530.9 |

**Supplemental Table S3: Detailed machine learning model statistics.**

| Model/Class        | TP    | FP    | Precision | Recall | F-Measure | MCC   | ROC Area | PRC Area |
|--------------------|-------|-------|-----------|--------|-----------|-------|----------|----------|
| <b>N46 - RF</b>    |       |       |           |        |           |       |          |          |
| Intracellular      | 0.929 | 0.456 | 0.86      | 0.929  | 0.893     | 0.523 | 0.82     | 0.908    |
| sEV                | 0.544 | 0.071 | 0.717     | 0.544  | 0.619     | 0.523 | 0.82     | 0.678    |
| Weighted           | 0.833 | 0.36  | 0.825     | 0.833  | 0.825     | 0.523 | 0.82     | 0.851    |
| <b>N46 - NB</b>    |       |       |           |        |           |       |          |          |
| Intracellular      | 0.703 | 0.177 | 0.923     | 0.703  | 0.798     | 0.459 | 0.837    | 0.918    |
| sEV                | 0.823 | 0.297 | 0.478     | 0.823  | 0.605     | 0.459 | 0.835    | 0.669    |
| Weighted           | 0.733 | 0.207 | 0.812     | 0.733  | 0.75      | 0.459 | 0.837    | 0.856    |
| <b>3T3-L1 - RF</b> |       |       |           |        |           |       |          |          |
| Intracellular      | 0.724 | 0.341 | 0.685     | 0.724  | 0.704     | 0.384 | 0.724    | 0.713    |
| sEV                | 0.659 | 0.276 | 0.7       | 0.659  | 0.679     | 0.384 | 0.724    | 0.702    |
| Weighted           | 0.692 | 0.309 | 0.692     | 0.692  | 0.691     | 0.384 | 0.724    | 0.708    |
| <b>3T3-L1 - NB</b> |       |       |           |        |           |       |          |          |
| Intracellular      | 0.546 | 0.2   | 0.736     | 0.546  | 0.627     | 0.357 | 0.718    | 0.661    |
| sEV                | 0.8   | 0.454 | 0.633     | 0.8    | 0.706     | 0.357 | 0.718    | 0.702    |
| Weighted           | 0.672 | 0.326 | 0.685     | 0.672  | 0.666     | 0.357 | 0.718    | 0.681    |
| <b>BAT - RF</b>    |       |       |           |        |           |       |          |          |
| Intracellular      | 0.78  | 0.329 | 0.737     | 0.78   | 0.758     | 0.454 | 0.794    | 0.795    |
| sEV                | 0.671 | 0.22  | 0.72      | 0.671  | 0.695     | 0.454 | 0.794    | 0.757    |
| Weighted           | 0.73  | 0.279 | 0.73      | 0.73   | 0.729     | 0.454 | 0.794    | 0.778    |
| <b>BAT - NB</b>    |       |       |           |        |           |       |          |          |
| Intracellular      | 0.605 | 0.231 | 0.756     | 0.605  | 0.672     | 0.376 | 0.766    | 0.778    |
| sEV                | 0.769 | 0.395 | 0.621     | 0.769  | 0.687     | 0.376 | 0.766    | 0.731    |
| Weighted           | 0.68  | 0.306 | 0.694     | 0.68   | 0.679     | 0.376 | 0.766    | 0.757    |
| <b>AML12 - RF</b>  |       |       |           |        |           |       |          |          |
| Intracellular      | 0.822 | 0.382 | 0.747     | 0.822  | 0.783     | 0.452 | 0.825    | 0.852    |
| sEV                | 0.618 | 0.178 | 0.717     | 0.618  | 0.664     | 0.452 | 0.825    | 0.754    |
| Weighted           | 0.736 | 0.296 | 0.735     | 0.736  | 0.733     | 0.452 | 0.825    | 0.811    |
| <b>AML12 - NB</b>  |       |       |           |        |           |       |          |          |
| Intracellular      | 0.734 | 0.268 | 0.79      | 0.734  | 0.761     | 0.461 | 0.792    | 0.816    |
| sEV                | 0.732 | 0.266 | 0.667     | 0.732  | 0.698     | 0.461 | 0.791    | 0.719    |
| Weighted           | 0.733 | 0.267 | 0.738     | 0.733  | 0.734     | 0.461 | 0.792    | 0.775    |
| <b>C2C12 - RF</b>  |       |       |           |        |           |       |          |          |
| Intracellular      | 0.8   | 0.295 | 0.729     | 0.8    | 0.763     | 0.507 | 0.826    | 0.799    |
| sEV                | 0.705 | 0.2   | 0.78      | 0.705  | 0.741     | 0.507 | 0.826    | 0.832    |

|                   |       |       |       |       |       |       |       |       |
|-------------------|-------|-------|-------|-------|-------|-------|-------|-------|
| Weighted          | 0.752 | 0.247 | 0.755 | 0.752 | 0.752 | 0.507 | 0.826 | 0.816 |
| <b>C2C12 - NB</b> |       |       |       |       |       |       |       |       |
| Intracellular     | 0.703 | 0.244 | 0.741 | 0.703 | 0.722 | 0.46  | 0.81  | 0.784 |
| sEV               | 0.756 | 0.297 | 0.72  | 0.756 | 0.738 | 0.46  | 0.811 | 0.798 |
| Weighted          | 0.73  | 0.27  | 0.73  | 0.73  | 0.73  | 0.46  | 0.811 | 0.791 |
| <b>SVEC - RF</b>  |       |       |       |       |       |       |       |       |
| Intracellular     | 0.866 | 0.324 | 0.802 | 0.866 | 0.833 | 0.556 | 0.829 | 0.857 |
| sEV               | 0.676 | 0.134 | 0.769 | 0.676 | 0.719 | 0.556 | 0.829 | 0.802 |
| Weighted          | 0.79  | 0.249 | 0.789 | 0.79  | 0.788 | 0.556 | 0.829 | 0.835 |
| <b>SVEC - NB</b>  |       |       |       |       |       |       |       |       |
| Intracellular     | 0.768 | 0.284 | 0.804 | 0.768 | 0.785 | 0.479 | 0.802 | 0.813 |
| sEV               | 0.716 | 0.232 | 0.671 | 0.716 | 0.693 | 0.479 | 0.801 | 0.762 |
| Weighted          | 0.747 | 0.263 | 0.751 | 0.747 | 0.749 | 0.479 | 0.802 | 0.793 |
